# Supplementary material
Source: publisher figshare collection journal article supplement (https://brill.figshare.com/articles/dataset/_/1613343)

## Genetic relatedness provides support for a species complex of myxosporeans infecting an Indian carp

Harpreet Kaur and Aditya Gupta

### Supplementary material 1

Agarose gel (2.0%) showing 18S rRNA gene amplication of *Thelohanellus filli* from the gills of Indian major carp *Labeo rohita*.

L1- 100 bp DNA Ladder, L2 & L3 - the parasite DNA

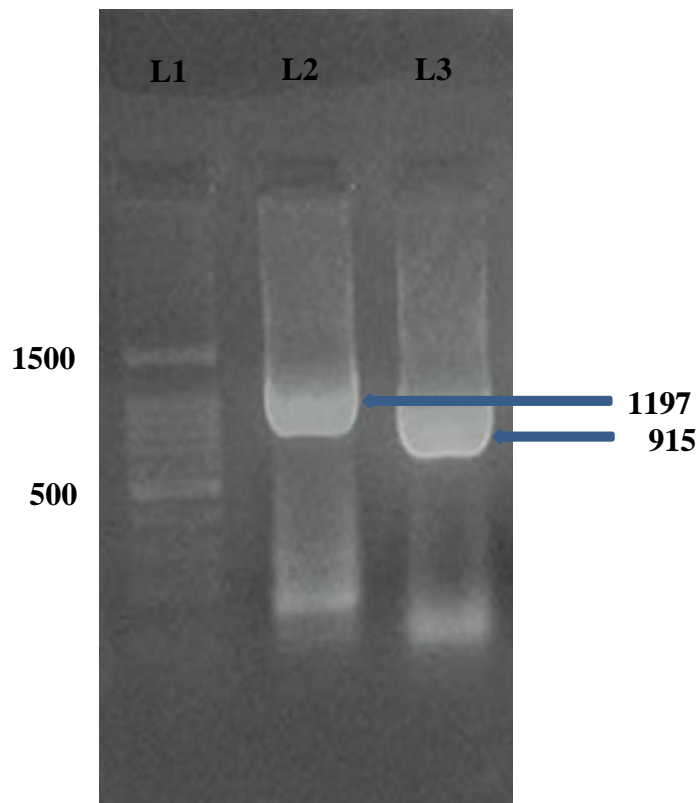

Supplement: Supplementary file 1 [file 1]
