# Supplementary material
Source: publisher figshare collection journal article supplement (https://brill.figshare.com/articles/dataset/_/1613343)
Supplement: Supplementary file 2 [file 1]

# Genetic relatedness provides support for a species complex of myxosporeans infecting an Indian carp

Harpreet Kaur and Aditya Gupta

## Supplementary material 2

Estimates of evolutionary divergence between the sequences of myxosporeans and a malacosporean available in NCBI GenBank database

|                                               | 1    | 2    | 3    | 4    | 5    | 6    | 7    | 8    | 9    | 10   | 11   | 12   | 13   | 14   | 15   | 16   | 17   |
|-----------------------------------------------|------|------|------|------|------|------|------|------|------|------|------|------|------|------|------|------|------|
| 1. AF001579/Ceratonova shasta/USA             |      | 0.04 | 0.04 | 0.04 | 0.04 | 0.04 | 0.04 | 0.04 | 0.04 | 0.04 | 0.04 | 0.04 | 0.04 | 0.05 | 0.04 | 0.04 | 0.04 |
| 2. KJ476886/Thelohanellus bifurcata/India     | 0.35 |      | 0.00 | 0.00 | 0.02 | 0.02 | 0.02 | 0.02 | 0.02 | 0.02 | 0.01 | 0.02 | 0.02 | 0.02 | 0.00 | 0.02 | 0.01 |
| 3. KJ476885/Thelohanellus jiroveci/India      | 0.35 | 0.00 |      | 0.00 | 0.02 | 0.02 | 0.02 | 0.02 | 0.02 | 0.02 | 0.01 | 0.02 | 0.02 | 0.02 | 0.00 | 0.02 | 0.01 |
| 4. KJ476884/Thelohanellus seni/India          | 0.34 | 0.01 | 0.01 |      | 0.02 | 0.02 | 0.02 | 0.02 | 0.02 | 0.02 | 0.01 | 0.02 | 0.02 | 0.02 | 0.00 | 0.02 | 0.01 |
| 5. HM624024/Thelohanellus kitauei/South Korea | 0.34 | 0.11 | 0.11 | 0.11 |      | 0.01 | 0.02 | 0.00 | 0.01 | 0.02 | 0.02 | 0.01 | 0.01 | 0.02 | 0.02 | 0.02 | 0.01 |
| 6. HQ613410/Thelohanellus wuhanensis/China    | 0.33 | 0.11 | 0.10 | 0.11 | 0.04 |      | 0.01 | 0.01 | 0.01 | 0.01 | 0.02 | 0.01 | 0.01 | 0.02 | 0.01 | 0.02 | 0.01 |
| 7. GU165832/Thelohanellus nikolskii/China     | 0.39 | 0.13 | 0.12 | 0.13 | 0.11 | 0.09 |      | 0.02 | 0.02 | 0.00 | 0.02 | 0.02 | 0.02 | 0.03 | 0.02 | 0.02 | 0.02 |
| 8. GQ396677/Thelohanellus kitauei/China       | 0.35 | 0.11 | 0.11 | 0.11 | 0.00 | 0.04 | 0.11 |      | 0.01 | 0.02 | 0.02 | 0.01 | 0.01 | 0.02 | 0.01 | 0.02 | 0.01 |
| 9. DQ231155/Thelohanellus hovorkai/Hungary    | 0.35 | 0.11 | 0.11 | 0.11 | 0.02 | 0.04 | 0.11 | 0.03 |      | 0.02 | 0.02 | 0.01 | 0.01 | 0.02 | 0.02 | 0.02 | 0.01 |
| 10. DQ231156/Thelohanellus nikolskii/Hungary  | 0.39 | 0.13 | 0.12 | 0.13 | 0.11 | 0.09 | 0.00 | 0.11 | 0.11 |      | 0.02 | 0.02 | 0.02 | 0.03 | 0.02 | 0.02 | 0.02 |
| 11. KM252682/Thelohanellus rohita/India       | 0.37 | 0.02 | 0.02 | 0.03 | 0.13 | 0.13 | 0.15 | 0.13 | 0.14 | 0.15 |      | 0.02 | 0.02 | 0.02 | 0.01 | 0.02 | 0.02 |
| 12. KC843624/Thelohanellus sp./China          | 0.35 | 0.13 | 0.13 | 0.13 | 0.07 | 0.07 | 0.12 | 0.07 | 0.07 | 0.12 | 0.16 |      | 0.02 | 0.02 | 0.02 | 0.02 | 0.01 |
| 13. JX458816/Thelohanellus sp./China          | 0.35 | 0.13 | 0.12 | 0.13 | 0.08 | 0.07 | 0.12 | 0.07 | 0.07 | 0.12 | 0.15 | 0.11 |      | 0.03 | 0.02 | 0.02 | 0.02 |
| 14. KM252687/Thelohanellus catiae/India       | 0.50 | 0.13 | 0.13 | 0.13 | 0.20 | 0.19 | 0.22 | 0.20 | 0.19 | 0.22 | 0.14 | 0.20 | 0.23 |      | 0.02 | 0.02 | 0.02 |
| 15. KR340464/Thelohanellus filli/India        | 0.34 | 0.00 | 0.00 | 0.00 | 0.11 | 0.10 | 0.12 | 0.10 | 0.11 | 0.12 | 0.02 | 0.13 | 0.12 | 0.13 |      | 0.01 | 0.01 |
| 16. KJ561441/Myxobolus tsangwuensis/China     | 0.35 | 0.11 | 0.10 | 0.11 | 0.11 | 0.12 | 0.16 | 0.11 | 0.12 | 0.16 | 0.13 | 0.10 | 0.14 | 0.18 | 0.10 |      | 0.01 |
| 17. DQ439810/Myxobolus cycloides/Hungary      | 0.38 | 0.09 | 0.09 | 0.09 | 0.09 | 0.09 | 0.14 | 0.09 | 0.10 | 0.14 | 0.11 | 0.09 | 0.13 | 0.17 | 0.09 | 0.09 |      |
